# Supplementary material for: Dynamic balance and instrumented gait variables are independent predictors of falls following stroke
Source: PubMed Central journal article supplement (PMC6322221; doi:10.1186/s12984-018-0478-4), 2019-01-07
Supplement: 12984_2018_478_MOESM1_ESM.pdf [file 12984_2018_478_MOESM1_ESM.pdf]

**Additional File 1.** Between-group differences and regression analyses with removal of those requiring physical assistance and/or gait aids (n=57)

|                                                     | Non-fallers<br>(n=43)<br>Mean±SD | Fallers<br>(n=14)<br>Mean±SD | Between-<br>group <sup>a</sup><br>P-value | 25 <sup>th</sup> – 75 <sup>th</sup><br>quartiles | Regression adjusted for country<br>and prior falls |               | Regression adjusted for country,<br>prior falls and 6mWT |               |
|-----------------------------------------------------|----------------------------------|------------------------------|-------------------------------------------|--------------------------------------------------|----------------------------------------------------|---------------|----------------------------------------------------------|---------------|
|                                                     |                                  |                              |                                           |                                                  | IQR-OR                                             | P-value       | IQR-OR (95% CI)                                          | P-value       |
| <b>Gait variables</b>                               |                                  |                              |                                           |                                                  |                                                    |               |                                                          |               |
| 6mWT-comfortable, m/s (n=42:14)                     | 0.93±0.28                        | 0.75±0.24                    | 0.077                                     | 0.69-1.04                                        | 2.30 (0.86-6.13) <sup>b</sup>                      | 0.096         | N/A                                                      | N/A           |
| Kinect-fast walk, m/s (n=41:14)                     | 1.10±0.27                        | 0.91±0.30                    | 0.066                                     | 0.87-1.27                                        | 2.53 (0.90-7.12) <sup>b</sup>                      | 0.080         | N/A                                                      | N/A           |
| Stride length, m (n=41:14)                          | 1.13±0.19                        | 0.99±0.23                    | <b>0.039*</b>                             | 0.99-1.24                                        | 1.97 (0.87-4.42) <sup>b</sup>                      | 0.102         | 1.13 (0.33-3.93) <sup>b</sup>                            | 0.842         |
| Cadence, steps/min (n=41:14)                        | 116.62±15.56                     | 107.32±21.65                 | 0.127                                     | 106.05-125.88                                    | 1.72 (0.80-3.70) <sup>b</sup>                      | 0.163         | 1.16 (0.44-3.04) <sup>b</sup>                            | 0.760         |
| Step width, m (n=41:14)                             | 0.14±0.04                        | 0.14±0.04                    | 0.954                                     | 0.11-0.16                                        | 1.28 (0.46-3.58) <sup>b</sup>                      | 0.633         | 1.65 (0.55-5.01) <sup>b</sup>                            | 0.372         |
| Step length asymmetry, ratio (n=41:14) <sup>c</sup> | 1.10±0.10                        | 1.09±0.07                    | 0.728                                     | 1.05-1.12                                        | 1.08 (0.54-2.16) <sup>b</sup>                      | 0.823         | 1.80 (0.67- <i>U</i> ) <sup>b</sup>                      | 0.246         |
| Gait speed variability, m/s (n=41:14) <sup>c</sup>  | 0.19±0.07                        | 0.14±0.04                    | <b>0.034*</b>                             | 0.12-0.19                                        | 2.57 (0.90-7.32) <sup>b</sup>                      | 0.078         | 1.70 (0.47-6.21) <sup>b</sup>                            | 0.419         |
| ML pelvic displacement, cm (n=40:14)                | 6.60±1.13                        | 5.26±1.13                    | <b>0.001*</b>                             | 5.42-7.04                                        | <b>9.35 (2.14-40.86)<sup>b</sup></b>               | <b>0.003*</b> | <b>8.54 (1.92-37.98)<sup>b</sup></b>                     | <b>0.005*</b> |
| Vertical pelvic displacement, cm (n=40:14)          | 3.82±1.15                        | 3.07±0.88                    | <b>0.036*</b>                             | 2.73-4.21                                        | 2.42 (0.86-6.78) <sup>b</sup>                      | 0.094         | 1.55 (0.41-5.86) <sup>b</sup>                            | 0.516         |
| <b>Balance variables</b>                            |                                  |                              |                                           |                                                  |                                                    |               |                                                          |               |
| TUG - normal, s (n=43:14) <sup>c</sup>              | 12.34±4.01                       | 16.18±7.51                   | <b>0.033*</b>                             | 9.79-15.59                                       | 2.58 (0.91-7.32)                                   | 0.075         | 2.40 (0.44-13.20)                                        | 0.313         |
| TUG - dual task, s (n=41:13) <sup>c</sup>           | 16.44±11.18                      | 19.44±9.81                   | 0.112                                     | 11.23-19.03                                      | 1.29 (0.58-2.85)                                   | 0.531         | 1.31 (0.46-3.73) <sup>b</sup>                            | 0.618         |
| Step test - affected, taps/15s (n=43:14)            | 11.84±4.36                       | 8.64±2.10                    | <b>0.014*</b>                             | 7.00-14.00                                       | <b>5.47 (1.22-24.52)<sup>b</sup></b>               | <b>0.026*</b> | 5.02 (0.84-28.87) <sup>b</sup>                           | 0.076         |
| Step test - less affected, taps/15s (n=43:14)       | 10.56±4.34                       | 6.14±2.48                    | <b>&lt;0.001*</b>                         | 7.00-12.00                                       | <b>6.19 (1.50-25.47)<sup>b</sup></b>               | <b>0.012*</b> | <b>9.58 (1.55-59.28)<sup>b</sup></b>                     | <b>0.015*</b> |
| COP vel EO total, cm/s (n=42:13) <sup>c</sup>       | 1.31±0.46                        | 1.55±1.10                    | 0.663                                     | 1.07-1.44                                        | 1.01 (0.61-1.70)                                   | 0.955         | 1.00 (0.58-1.71)                                         | 0.986         |
| COP vel EO ML, cm/s (n=42:13) <sup>c</sup>          | 0.54±0.17                        | 0.71±0.58                    | 0.766                                     | 0.42-0.66                                        | 1.44 (0.64-3.22)                                   | 0.377         | 1.42 (0.63-3.22)                                         | 0.402         |
| COP vel EO AP, cm/s (n=42:13) <sup>c</sup>          | 1.07±0.44                        | 1.23±0.83                    | 0.890                                     | 0.83-1.18                                        | 1.06 (0.58-1.92) <sup>b</sup>                      | 0.861         | 1.07 (0.57-2.01) <sup>b</sup>                            | 0.832         |
| COP vel EC total, cm/s (n=41:13) <sup>c</sup>       | 1.90±0.87                        | 2.07±1.41                    | 0.678                                     | 1.35-2.18                                        | 1.25 (0.61-2.57) <sup>b</sup>                      | 0.540         | 1.26 (0.60-2.67) <sup>b</sup>                            | 0.541         |
| COP vel EC ML, cm/s (n=41:13) <sup>c</sup>          | 0.66±0.23                        | 0.78±0.58                    | 0.800                                     | 0.50-0.78                                        | 1.11 (0.55-2.21)                                   | 0.774         | 1.06 (0.52-2.18)                                         | 0.869         |
| COP vel EC AP, cm/s (n=41:13) <sup>c</sup>          | 1.66±0.82                        | 1.76±1.20                    | 0.564                                     | 1.14-1.84                                        | 1.35 (0.67-2.71) <sup>b</sup>                      | 0.407         | 1.35 (0.65-2.81) <sup>b</sup>                            | 0.420         |

\* Denotes a significance at  $P < 0.05$

<sup>a</sup> Between-group differences assessed using Mann-Whitney U tests; <sup>b</sup> an inverse relationship with falls exists, therefore IQR-OR compares the odds of having more falls among individuals with predictor values at the 25<sup>th</sup> percentile with the odds of having more falls among individuals with predictor values at the 75<sup>th</sup> percentile; <sup>c</sup> log-transformed for regression analysis due to significant positive skew.

Abbreviations: 6mWT = 6-metre walk test; AP = anteroposterior; COP = centre of pressure; EC = eyes closed; EO = eyes open; IQR = interquartile range; ML = mediolateral; OR = odds ratio; TUG = timed up and go; U = unable to calculate
